# Supplementary material for: The P2X7 receptor tracer [11C]SMW139 as an in vivo marker of neuroinflammation in multiple sclerosis: a first-in man study
Source: Springer Nature journal article supplement (doi:10.1007/s00259-019-04550-x), 2019-11-08
Supplement: MOESM2 [file 17366464]

**Online Resource 2.** Reliability of kinetic parameter estimates for the 2T4k\_V<sub>B</sub>\_k<sub>4</sub> model

For K<sub>1</sub>, k<sub>2</sub> and V<sub>B</sub> a cut-off of 25% was used and for k<sub>3</sub> and k<sub>4</sub> a cut-off of 50%. Higher values are highlighted.

A) %SE for K<sub>1</sub>

|                      | MS1  | MS2  | MS3  | MS4  | MS5  | Mean | HC1  | HC2  | HC3  | HC4  | HC5  | Mean |
|----------------------|------|------|------|------|------|------|------|------|------|------|------|------|
| Frontal cortex       | 5.5  | 10.5 | 12.4 | 12.6 | 10.4 | 10.3 | 7.6  | 8.4  | 10.4 | 11.9 | 13.2 | 10.3 |
| Orbitofrontal cortex | 6.6  | 13.7 | 14.1 | 14.1 | 12.2 | 12.1 | 9.0  | 10.7 | 10.9 | 12.3 | 16.9 | 12.0 |
| Paracentral cortex   | 5.8  | 10.2 | 11.4 | 11.0 | 9.9  | 9.7  | 7.4  | 8.4  | 9.8  | 10.8 | 12.0 | 9.7  |
| Parietal cortex      | 6.4  | 8.7  | 10.6 | 10.0 | 8.9  | 8.9  | 6.4  | 7.6  | 8.2  | 10.8 | 10.9 | 8.8  |
| Temporal cortex      | 5.1  | 9.2  | 11.9 | 10.6 | 8.6  | 9.1  | 6.2  | 8.9  | 8.4  | 11.6 | 10.7 | 9.2  |
| Occipital cortex     | 4.6  | 8.8  | 8.8  | 7.2  | 5.9  | 7.1  | 4.1  | 7.1  | 6.6  | 8.4  | 6.8  | 6.6  |
| Cingulate cortex     | 9.9  | 15.2 | 12.9 | 15.6 | 13.8 | 13.5 | 10.2 | 11.2 | 13.1 | 13.9 | 17.5 | 13.2 |
| Thalamic GM          | 10.4 | 10.8 | 10.1 | 8.8  | 10.6 | 10.1 | 3.8  | 7.1  | 14.1 | 11.4 | 11.2 | 9.5  |
| Putaminal GM         | 5.3  | 12.7 | 13.3 | 11.2 | 12.4 | 11.0 | 6.4  | 14.3 | 10.8 | 19.2 | 12.5 | 12.6 |
| Caudate nucleus GM   | 6.2  | 10.9 | 13.0 | 13.8 | 11.0 | 11.0 | 9.2  | 15.0 | 15.7 | 12.2 | 13.3 | 13.1 |
| Hippocampal GM       | 8.3  | 13.9 | 15.0 | 18.5 | 14.3 | 14.0 | 12.0 | 19.2 | 12.5 | 20.3 | 16.7 | 16.1 |
| Cerebellar GM        | 3.6  | 5.6  | 7.6  | 5.7  | 5.6  | 5.6  | 5.8  | 5.1  | 5.2  | 8.8  | 6.1  | 6.2  |
| Cerebellar WM        | 6.0  | 5.2  | 6.7  | 6.1  | 6.2  | 6.0  | 7.1  | 6.5  | 7.1  | 11.1 | 8.0  | 8.0  |
| Brainstem WM         | 8.1  | 7.9  | 10.3 | 8.2  | 14.3 | 9.8  | 15.1 | 9.8  | 9.8  | 13.1 | 9.5  | 11.5 |
| Non-lesional WM      | 6.6  | 9.6  | 8.7  | 8.0  | 8.6  | 8.3  | 8.4  | 9.1  | 9.5  | 11.5 | 10.6 | 9.8  |
| T2 MS lesions        | 6.4  | 11.0 | 4.8  | 5.5  | 7.7  | 7.1  |      |      |      |      |      |      |
| Enhancing MS lesions | 8.0  | 19.4 | 4.5  | 4.2  |      | 9.0  |      |      |      |      |      |      |

B) %SE for K<sub>2</sub>

|                      | MS1  | MS2  | MS3  | MS4  | MS5  | Mean | HC1  | HC2  | HC3  | HC4  | HC5  | Mean |
|----------------------|------|------|------|------|------|------|------|------|------|------|------|------|
| Frontal cortex       | 6.9  | 13.4 | 15.9 | 15.6 | 13.8 | 13.1 | 9.9  | 9.5  | 12.9 | 13.9 | 15.0 | 12.2 |
| Orbitofrontal cortex | 8.3  | 18.2 | 18.4 | 17.5 | 16.3 | 15.7 | 11.6 | 12.4 | 13.4 | 14.2 | 19.2 | 14.2 |
| Paracentral cortex   | 7.4  | 13.3 | 14.9 | 13.9 | 13.2 | 12.5 | 9.7  | 9.7  | 12.1 | 12.8 | 13.7 | 11.6 |
| Parietal cortex      | 8.0  | 11.3 | 13.8 | 12.5 | 11.7 | 11.5 | 8.2  | 8.8  | 10.2 | 12.5 | 12.2 | 10.4 |
| Temporal cortex      | 6.5  | 12.0 | 15.6 | 13.4 | 11.5 | 11.8 | 8.3  | 10.5 | 10.7 | 13.7 | 12.3 | 11.1 |
| Occipital cortex     | 5.7  | 11.2 | 11.5 | 9.0  | 7.8  | 9.0  | 5.2  | 8.3  | 8.3  | 9.8  | 7.7  | 7.9  |
| Cingulate cortex     | 12.8 | 19.5 | 17.0 | 19.8 | 18.6 | 17.5 | 13.7 | 13.1 | 16.2 | 16.4 | 20.8 | 16.0 |
| Thalamic GM          | 12.7 | 12.8 | 12.6 | 10.4 | 13.4 | 12.4 | 4.7  | 8.0  | 17.0 | 13.2 | 12.3 | 11.0 |
| Putaminal GM         | 6.6  | 15.6 | 16.0 | 13.2 | 15.6 | 13.4 | 8.2  | 15.5 | 13.1 | 21.6 | 13.3 | 14.3 |
| Caudate nucleus GM   | 7.4  | 13.1 | 15.4 | 16.9 | 14.1 | 13.4 | 11.0 | 16.0 | 18.7 | 14.1 | 14.7 | 14.9 |
| Hippocampal GM       | 10.7 | 17.6 | 19.7 | 24.6 | 19.6 | 18.4 | 16.5 | 23.5 | 16.7 | 25.4 | 19.7 | 20.4 |
| Cerebellar GM        | 4.5  | 6.9  | 9.4  | 6.9  | 7.2  | 7.0  | 7.1  | 5.6  | 6.4  | 9.8  | 6.6  | 7.1  |
| Cerebellar WM        | 9.3  | 8.2  | 10.4 | 9.1  | 9.8  | 9.4  | 11.7 | 9.4  | 11.2 | 16.3 | 10.8 | 11.9 |
| Brainstem WM         | 11.9 | 12.1 | 15.1 | 11.9 | 22.0 | 14.6 | 25.1 | 13.3 | 15.3 | 19.0 | 12.7 | 17.1 |
| Non-lesional WM      | 10.7 | 14.9 | 14.4 | 12.6 | 14.8 | 13.5 | 14.4 | 13.5 | 15.6 | 17.8 | 14.8 | 15.2 |
| T2 MS lesions        | 10.8 | 20.8 | 9.4  | 9.7  | 14.9 | 13.1 |      |      |      |      |      |      |
| Enhancing MS lesions | 14.3 | 39.2 | 9.0  | 8.5  |      | 17.8 |      |      |      |      |      |      |

C) %SE for K<sub>3</sub>

|                      | MS1  | MS2   | MS3  | MS4  | MS5  | Mean | HC1  | HC2  | HC3  | HC4  | HC5  | Mean |
|----------------------|------|-------|------|------|------|------|------|------|------|------|------|------|
| Frontal cortex       | 13.2 | 22.3  | 20.4 | 21.2 | 17.2 | 18.9 | 17.1 | 20.5 | 21.4 | 29.8 | 21.1 | 22.0 |
| Orbitofrontal cortex | 15.0 | 33.7  | 24.6 | 21.6 | 22.6 | 23.5 | 19.8 | 27.1 | 23.4 | 31.0 | 27.4 | 25.7 |
| Paracentral cortex   | 14.2 | 19.1  | 19.2 | 19.2 | 15.9 | 17.5 | 16.0 | 18.1 | 18.9 | 27.9 | 19.0 | 20.0 |
| Parietal cortex      | 14.9 | 16.6  | 17.1 | 16.0 | 14.2 | 15.8 | 13.1 | 15.7 | 15.7 | 25.8 | 15.7 | 17.2 |
| Temporal cortex      | 12.6 | 21.8  | 21.0 | 19.1 | 16.3 | 18.2 | 15.6 | 21.7 | 19.6 | 31.0 | 17.5 | 21.1 |
| Occipital cortex     | 11.0 | 16.4  | 14.4 | 11.6 | 10.0 | 12.7 | 8.0  | 12.4 | 12.6 | 19.9 | 9.4  | 12.5 |
| Cingulate cortex     | 24.1 | 35.9  | 23.6 | 31.3 | 26.1 | 28.2 | 23.8 | 29.9 | 30.4 | 40.7 | 31.4 | 31.2 |
| Thalamic GM          | 31.7 | 25.9  | 18.6 | 19.5 | 23.4 | 23.8 | 13.9 | 25.6 | 39.9 | 53.9 | 22.8 | 31.2 |
| Putaminal GM         | 18.0 | 36.7  | 22.2 | 20.5 | 26.1 | 24.7 | 23.6 | 43.2 | 33.7 | 68.1 | 24.7 | 38.7 |
| Caudate nucleus GM   | 15.1 | 24.4  | 17.7 | 25.9 | 18.9 | 20.4 | 20.5 | 32.5 | 32.1 | 33.5 | 19.6 | 27.6 |
| Hippocampal GM       | 19.5 | 38.4  | 27.3 | 38.1 | 30.6 | 30.8 | 35.8 | 55.5 | 36.4 | 74.6 | 34.2 | 47.3 |
| Cerebellar GM        | 9.3  | 13.1  | 11.1 | 9.3  | 9.2  | 10.4 | 11.6 | 10.8 | 12.4 | 26.5 | 9.3  | 14.1 |
| Cerebellar WM        | 18.7 | 15.6  | 18.9 | 18.0 | 17.2 | 17.7 | 22.8 | 21.2 | 19.8 | 35.0 | 17.6 | 23.3 |
| Brainstem WM         | 23.5 | 27.2  | 25.3 | 20.9 | 35.2 | 26.4 | 51.5 | 29.1 | 29.1 | 48.0 | 21.1 | 35.8 |
| Non-lesional WM      | 18.7 | 22.6  | 25.4 | 24.7 | 23.2 | 22.9 | 21.1 | 25.5 | 22.7 | 30.5 | 21.9 | 24.3 |
| T2 MS lesions        | 18.9 | 38.5  | 26.4 | 24.0 | 24.1 | 26.4 |      |      |      |      |      |      |
| Enhancing MS lesions | 39.3 | 128.3 | 28.5 | 35.7 |      | 58.0 |      |      |      |      |      |      |

D) %SE for V<sub>B</sub>

|                      | MS1  | MS2  | MS3  | MS4  | MS5  | Mean | HC1  | HC2  | HC3  | HC4  | HC5  | Mean |
|----------------------|------|------|------|------|------|------|------|------|------|------|------|------|
| Frontal cortex       | 6.5  | 9.9  | 10.5 | 8.9  | 9.5  | 9.1  | 5.1  | 6.2  | 8.0  | 8.3  | 8.5  | 7.2  |
| Orbitofrontal cortex | 7.9  | 14.7 | 11.9 | 11.6 | 11.4 | 11.5 | 6.6  | 8.1  | 9.1  | 9.6  | 11.8 | 9.0  |
| Paracentral cortex   | 7.2  | 9.1  | 9.7  | 8.1  | 9.0  | 8.6  | 5.2  | 6.1  | 8.0  | 7.6  | 7.8  | 6.9  |
| Parietal cortex      | 7.5  | 8.7  | 8.8  | 7.4  | 7.7  | 8.0  | 4.6  | 5.3  | 6.3  | 6.8  | 6.9  | 6.0  |
| Temporal cortex      | 7.0  | 9.5  | 10.7 | 8.3  | 8.0  | 8.7  | 4.6  | 6.4  | 6.9  | 8.5  | 7.7  | 6.8  |
| Occipital cortex     | 5.0  | 8.4  | 6.1  | 4.4  | 4.2  | 5.6  | 2.6  | 4.2  | 4.5  | 5.0  | 4.0  | 4.1  |
| Cingulate cortex     | 12.1 | 13.0 | 10.8 | 11.7 | 12.1 | 11.9 | 6.3  | 7.6  | 10.5 | 8.4  | 11.8 | 8.9  |
| Thalamic GM          | 13.7 | 9.9  | 7.4  | 8.8  | 10.4 | 10.0 | 3.4  | 5.5  | 13.8 | 8.9  | 7.5  | 7.8  |
| Putaminal GM         | 7.6  | 13.0 | 11.6 | 9.5  | 12.5 | 10.8 | 5.4  | 11.7 | 12.5 | 15.2 | 10.4 | 11.0 |
| Caudate nucleus GM   | 8.5  | 12.4 | 11.5 | 11.2 | 9.6  | 10.6 | 7.8  | 14.1 | 16.8 | 10.4 | 8.7  | 11.6 |
| Hippocampal GM       | 10.7 | 14.9 | 15.6 | 13.0 | 15.0 | 13.8 | 10.0 | 13.9 | 11.8 | 12.6 | 11.4 | 11.9 |
| Cerebellar GM        | 5.0  | 6.3  | 5.9  | 4.4  | 4.7  | 5.3  | 4.4  | 3.8  | 4.4  | 5.3  | 4.7  | 4.5  |
| Cerebellar WM        | 8.6  | 6.9  | 8.2  | 6.9  | 6.8  | 7.5  | 6.5  | 5.7  | 7.4  | 8.2  | 7.3  | 7.0  |
| Brainstem WM         | 14.5 | 11.4 | 11.2 | 9.8  | 14.5 | 12.3 | 11.9 | 9.4  | 10.8 | 10.2 | 8.8  | 10.2 |
| Non-lesional WM      | 10.2 | 10.6 | 10.8 | 9.2  | 10.0 | 10.2 | 6.7  | 8.2  | 9.2  | 9.2  | 8.8  | 8.4  |
| T2 MS lesions        | 11.2 | 15.2 | 10.2 | 8.5  | 8.6  | 10.7 |      |      |      |      |      |      |
| Enhancing MS lesions | 17.7 | 26.1 | 10.3 | 12.6 |      | 16.7 |      |      |      |      |      |      |

Abbreviations: GM = grey matter, HC = healthy control, MS = multiple sclerosis patient, SE = standard error, WM = white matter
